# Supplementary material
Source: PubMed Central journal article supplement (PMC2911477)
Supplement: NIHMS1340-supplement-supplementary.pdf [file NIHMS1340-supplement-supplementary.pdf]

Table S1. Oligonucleotide primers used in this study.

| Primer    | Nucleotide Sequence                                  |
|-----------|------------------------------------------------------|
| SpuAF     | 5'-CACCCATATGGCTAGCGATAACTACTTCCGTATC-3'             |
| SpuAR     | 5'-GGATCCCTCGAGTTATTACAGCTTGTTTATCTGGGGTTGC-3'       |
| MALXF     | 5'-TATATAGCTAGCGATAAGCCTGCTGATTCTGGTTCATCTGAATCAC-3' |
| MALXR     | 5'-GCGCGCCTCGAGTTATTATTACCAAATTTTGTGTTGATTGTTTCTT-3' |
| CAM-F     | 5'-TTTGGAGCTAGCGATGAAAATTTGTTTGAT- 3'                |
| CAM-R     | 5'-CTTTGTCTCGAGGTACAGTCCGGCATTATC- 3'                |
| SpuA-1F   | 5'-AACGTACCCCTGGAAGGTCT-3'                           |
| SpuA -1R* | 5'-CATATGGCTAGCGAGGGAACGGATGCTGTAGA-3'               |
| SpuA -2F  | 5'-GTGGTGCTCGAGCAGGAATCAGCCTCCTTGC-3'                |
| SpuA -2R  | 5'-TGACTCAAACGATTGCTGGT-3'                           |
| MalX-1F   | 5'-GGAAGGATTTGCCAGTAACG- 3'                          |
| MalX-1R*  | 5'-GCAAGCTACCAAAAGCAAGC- 3'                          |
| MalX-2F   | 5'-GTGGTGCTCGAGCAGCTGCTAACGATGCTGTAA- 3'             |
| MalX-2R   | 5'-GCCAAAGCCCAAATGATAGT- 3'                          |

\*an *NheI* restriction site was located just upstream of the primer site

Engineered restriction sites are underlined; *NheI* is GCTAGC and *XhoI* is CTCGAG.
